# Supplementary material for: The Drosophila CLAMP protein associates with diverse proteins on chromatin
Source: PubMed Central journal article supplement (PMC5744976; doi:10.1371/journal.pone.0189772), 2017-12-27

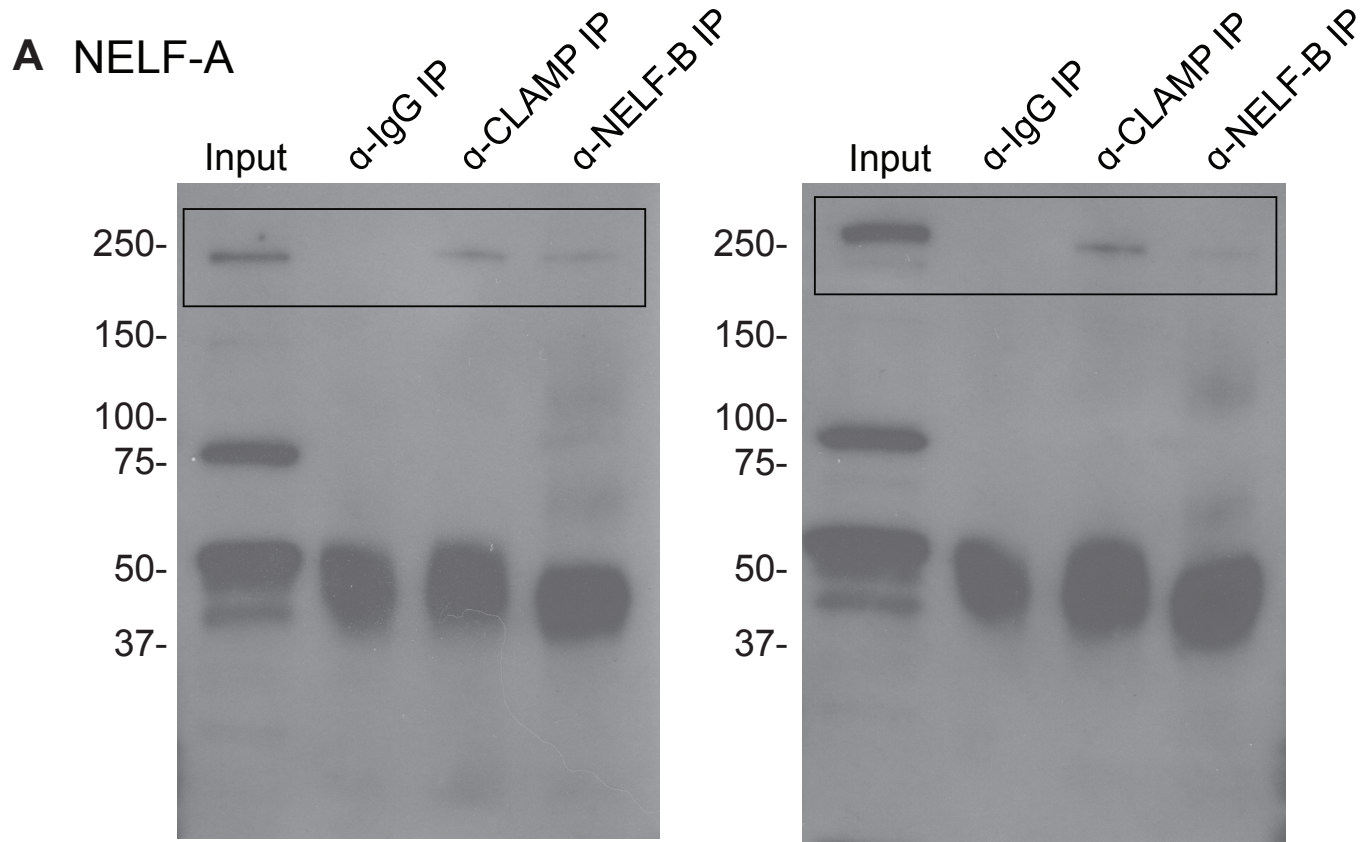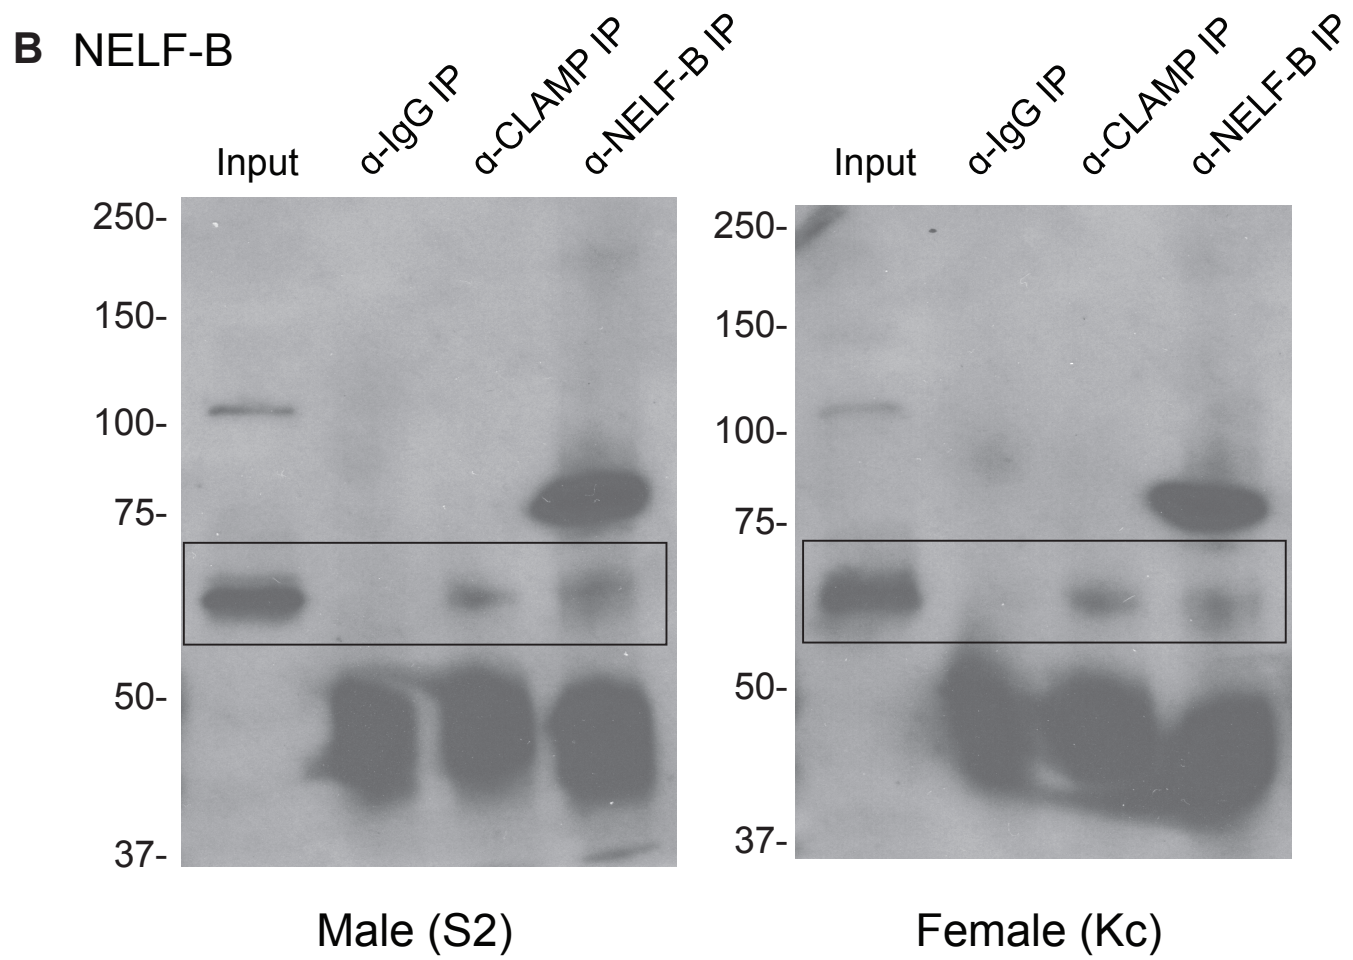

Supplement: pone.0189772.s001.pdf [file pone.0189772.s001.pdf]
