# Supplementary material for: The Drosophila CLAMP protein associates with diverse proteins on chromatin
Source: PubMed Central journal article supplement (PMC5744976; doi:10.1371/journal.pone.0189772), 2017-12-27
Supplement: pone.0189772.s002.pdf [file pone.0189772.s002.pdf]

---

**Kc Cells Protein Names**


---

|                                                       |                                                    |
|-------------------------------------------------------|----------------------------------------------------|
| ATP Synthase Beta subunit                             | Succinyl coenzyme A synthetase $\alpha$ subunit    |
| Squid*                                                | Dipeptidyl peptidase 3*                            |
| Bicaudal                                              | Eukaryotic initiation factor 4A-III*               |
| Mitochondrial trifunctional protein $\alpha$ subunit* | CG10166                                            |
| Ran*                                                  | Sterol carrier protein X-related thiolase          |
| Protein disulfide-isomerase                           | CG17597                                            |
| delta-1-Pyrroline-5-carboxylate dehydrogenase 1       | CG5776                                             |
| CG10576                                               | 60 kDa heat shock protein homolog 2                |
| Dihydrolipoyl dehydrogenase                           | Capulet*                                           |
| Heterogeneous nuclear ribonucleoprotein at 98DE*      | CG2076                                             |
| 60 kDa heat shock protein                             | Chd64*                                             |
| Apontic*                                              | Knockdown*                                         |
| Heterogeneous nuclear ribonucleoprotein A1*           | CG7033*                                            |
| mitochondrial single stranded DNA-binding protein     | Kayak                                              |
| CG5044*                                               | CG2918*                                            |
| Thioredoxin peroxidase 2                              | Cyclophilin 1                                      |
| calcium-binding protein 1                             | Ribonucleoside-diphosphate reductase large subunit |
| Short Stop*                                           | ERp60*                                             |
| CG5174*                                               | Zipper*                                            |
| Non-Specific Lethal 1*                                | CG8036*                                            |
| Pyruvate kinase*                                      | Sec61 $\alpha$ subunit                             |
| Heat shock 70 kDa protein cognate 5                   | Putative Achaete Scute Target 1*                   |
| Proteasome subunit beta type-1                        | Ecdysone-inducible gene L3                         |
| Failed axon connections*                              | Aldehyde dehydrogenase                             |
| p53*                                                  | NudC                                               |
