# Supplementary material for: The Drosophila CLAMP protein associates with diverse proteins on chromatin
Source: PubMed Central journal article supplement (PMC5744976; doi:10.1371/journal.pone.0189772), 2017-12-27
Supplement: pone.0189772.s004.pdf [file pone.0189772.s004.pdf]

| <b>Kc and S2 Cells</b> | <b>Kc and S2XL Cells</b> | <b>S2 and S2XL Cells</b>                     |
|------------------------|--------------------------|----------------------------------------------|
| Nocte                  | Prohibitin*              | Eukaryotic Translation Initiation Factor 4G* |
| Lingerer               | lethal (2) 37Cc*         | Glycoprotein 210 kDa                         |
| Bor                    | Ribosomal protein L6     | Pif1A*                                       |
| Uridine_kinase*        | Histone H3*              | Histone 4                                    |
| Calreticulin           | Histone H3.3             | Ribosomal protein L23A                       |
| Histone H2A*           | Quaking Related *        |                                              |
| Porin                  | Modulo                   |                                              |
