# Supplementary material for: The Drosophila CLAMP protein associates with diverse proteins on chromatin
Source: PubMed Central journal article supplement (PMC5744976; doi:10.1371/journal.pone.0189772), 2017-12-27
Supplement: pone.0189772.s005.pdf [file pone.0189772.s005.pdf]

| <b>Protein Name</b>               | <b>S2 Cells</b> | <b>Kc Cells</b> | <b>S2 Cells XL</b> |
|-----------------------------------|-----------------|-----------------|--------------------|
| <b>CLAMP*</b>                     | 10.250          | 8.913           | 160.107            |
| <b>Stress-Sensitive B*</b>        | 6.689           | 16.722          | -209.431           |
| <b>NOCTE</b>                      | 4.223           | 3.573           | -8.896             |
| <b>Elongation factor 1-alpha*</b> | 2.706           | 1.623           | 122.121            |
| <b>Histone H2B</b>                | 2.033           | 4.065           | -1284.309          |
| <b>NELF-A</b>                     | 1.199           | 2.398           | 41.551             |
| <b>Syncrip*</b>                   | 0.945           | 0.473           | 38.658             |
| <b>Porin</b>                      | 0.887           | 5.319           | -175.284           |
| <b>Bor</b>                        | 0.828           | 1.656           | -259.205           |
| <b>Calreticulin</b>               | 0.616           | 1.847           | 0.000              |
| <b>Lingerer*</b>                  | 0.563           | 0.188           | 0.000              |
| <b>Uridine kinase*</b>            | 0.446           | 0.446           | 0.000              |
| <b>Clueless*</b>                  | 0.173           | 0.863           | 47.935             |
