# Supplementary material for: The Drosophila CLAMP protein associates with diverse proteins on chromatin
Source: PubMed Central journal article supplement (PMC5744976; doi:10.1371/journal.pone.0189772), 2017-12-27
Supplement: pone.0189772.s006.pdf [file pone.0189772.s006.pdf]

# S5 Table (Urban)

|                                         | All         | TSS+/-250   | GB (TSS+250:TTS) | Intergenic (rest) |
|-----------------------------------------|-------------|-------------|------------------|-------------------|
| All CLAMP peaks                         |             | 31.6        | 51.1             | 17.3              |
| CLAMP only                              | 54.38632619 | 37.3        | 42.2             | 20.5              |
| CLAMP with only GAF                     | 34.81603515 | 16.7        | 67.5             | 15.8              |
| CLAMP with only NELF                    | 2.169137836 | 72.8        | 18.4             | 8.9               |
| CLAMP with GAF and NELF                 | 8.628500824 | 45.9        | 48.9             | 5.2               |
| CLAMP with GAF (NELF is not considered) | 43.44453597 | 22.51540528 | 63.81734871      | 13.66724601       |
| CLAMP with NELF (GAF is not considered) | 10.79763866 | 51.30324221 | 42.78448824      | 5.912269549       |
|                                         |             |             |                  |                   |
| All GAF peaks                           |             | 18.4        | 65.7             | 15.9              |
| GAF only                                | 17.91685495 | 16.4        | 61.4             | 22.2              |
| GAF with only CLAMP                     | 61.65838229 | 14.8        | 69.5             | 15.8              |
| GAF with only NELF                      | 0.338906462 | 33.3        | 46.7             | 20                |
| GAF with CLAMP and NELF                 | 20.0858563  | 30.9        | 58.3             | 10.8              |
| GAF with CLAMP (NELF is not considered) | 81.74423859 | 18.73963516 | 66.72194583      | 14.53841902       |
| GAF with NELF (CLAMP is not considered) | 20.42476277 | 30.97345133 | 58.07522124      | 10.95132743       |
|                                         |             |             |                  |                   |
| ALL NELF peaks                          |             | 43.4        | 47.8             | 8.8               |
| NELF only                               | 18.1773399  | 16          | 59.6             | 24.4              |
| NELF with only CLAMP                    | 16.10837438 | 70.9        | 20.5             | 8.6               |
| NELF with only GAF                      | 9.458128079 | 18.2        | 77.6             | 4.2               |
| NELF with CLAMP and GAF                 | 56.25615764 | 48.6        | 46.8             | 4.6               |
| NELF with CLAMP (GAF is not considered) | 72.36453202 | 53.57385977 | 40.91218516      | 5.513955071       |
| NELF with GAF (CLAMP is not considered) | 65.71428571 | 44.22788606 | 51.1994003       | 4.572713643       |
